# Supplementary material
Source: PubMed Central journal article supplement (PMC5392432)
Supplement: NIHMS838365-supplement-01.pdf [file NIHMS838365-supplement-01.pdf]

| Subject | Group, Disease     | Age | Sex | Race/ Ethnicity | Related FH      | Other Auto-immune       | Duration of Disease |
|---------|--------------------|-----|-----|-----------------|-----------------|-------------------------|---------------------|
| 1       | Screening, Active  | 45  | F   | White           | Negative        | None                    | 13                  |
| 2       | Screening, Active  | 52  | M   | Asian           | Negative        | None                    | 37+                 |
| 3       | Screening, Active  | 30  | F   | White           | Negative        | None                    | 23                  |
| 4       | Screening, Active  | 44  | F   | White/ Hispanic | Negative        | None                    | 34                  |
| 5       | Screening, Active  | 34  | F   | White           | Negative        | None                    | 10+                 |
| 6       | Screening, Active  | 30  | F   | Black/ Hispanic | Negative        | None                    | 2                   |
| 7       | Screening, Active  | 34  | F   | Black/ Hispanic | Negative        | None                    | 4                   |
| 8       | Screening, Active  | 52  | M   | White           | Negative        | None                    | 34+                 |
| 9       | Validation, Stable | 39  | M   | White           | Negative        | None                    | 15+                 |
| 10      | Validation, Stable | 47  | F   | White           | Negative        | None                    | 30+                 |
| 11      | Validation, Active | 55  | F   | White           | Negative        | None                    | 2                   |
| 12      | Validation, Stable | 31  | F   | White           | Negative        | None                    | 25                  |
| 13      | Validation, Active | 62  | F   | Black           | Negative        | Hashimoto's Thyroiditis | 1                   |
| 14      | Validation, Active | 49  | F   | White           | Negative        | None                    | 19                  |
| 15      | Validation, Active | 54  | F   | Black           | Negative        | None                    | 7                   |
| 16      | Validation, Active | 8   | F   | Asian           | Negative        | None                    | 5                   |
| 17      | Validation, Active | 56  | F   | White           | Negative        | None                    | 41                  |
| 18      | Validation, Active | 51  | F   | White           | Vitiligo        | None                    | 37                  |
| 19      | Validation, Stable | 33  | M   | White           | Negative        | None                    | 7                   |
| 20      | Validation, Active | 55  | M   | White           | RA              | None                    | 5                   |
| 21      | Screening, Healthy | 61  | F   | White           | Type 1 Diabetes | None                    | N/A                 |

|    |                        |    |   |                    |          |      |     |
|----|------------------------|----|---|--------------------|----------|------|-----|
| 22 | Screening,<br>Healthy  | 25 | F | Black              | Negative | None | N/A |
| 23 | Screening,<br>Healthy  | 25 | F | Black              | Negative | None | N/A |
| 24 | Screening,<br>Healthy  | 18 | F | White/<br>Hispanic | Vitiligo | None | N/A |
| 25 | Screening,<br>Healthy  | 24 | M | White              | Negative | None | N/A |
| 26 | Screening,<br>Healthy  | 28 | F | White              | Negative | None | N/A |
| 27 | Screening,<br>Healthy  | 25 | M | White              | Negative | None | N/A |
| 28 | Screening,<br>Healthy  | 33 | M | White              | Negative | None | N/A |
| 29 | Validation,<br>Healthy | 40 | F | Asian              | Vitiligo | None | N/A |

## Supplementary Figure 1: Gating Strategy and Flow Controls

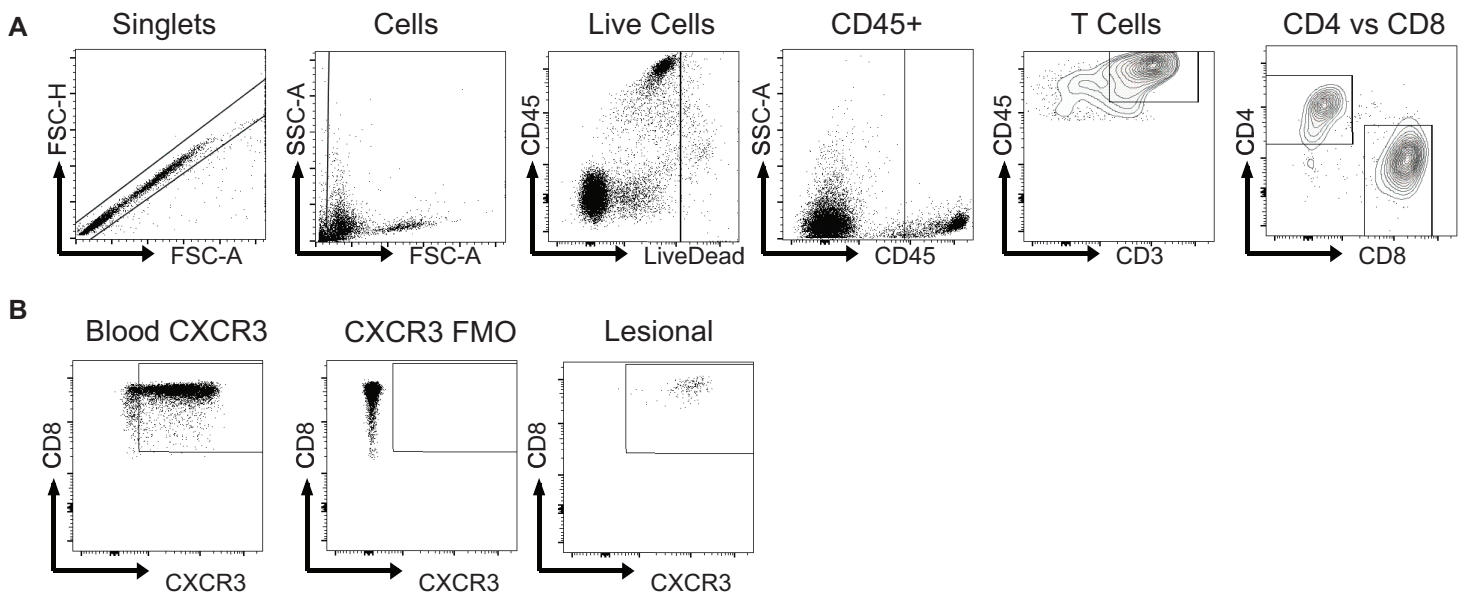

## Supplementary Figure 2: CD3 and CD4 Quantification

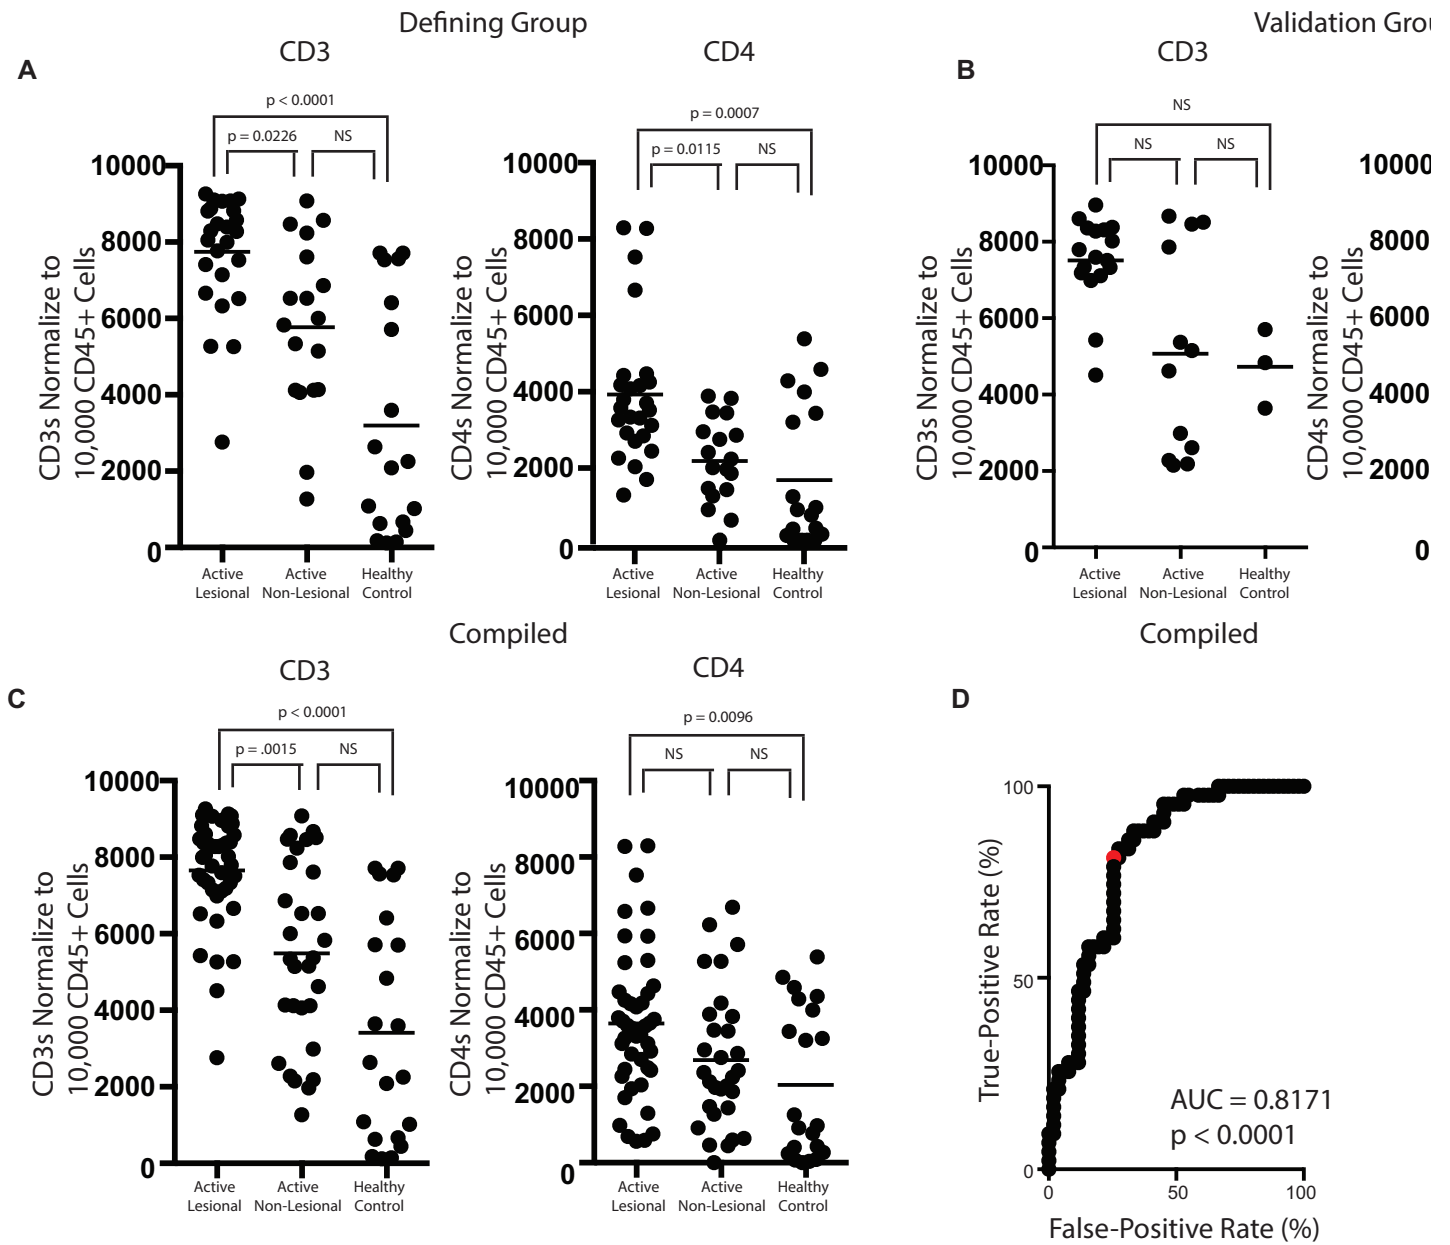

### Supplementary Figure 3: Skin CXCL11 and IFN-g Protein Concentration

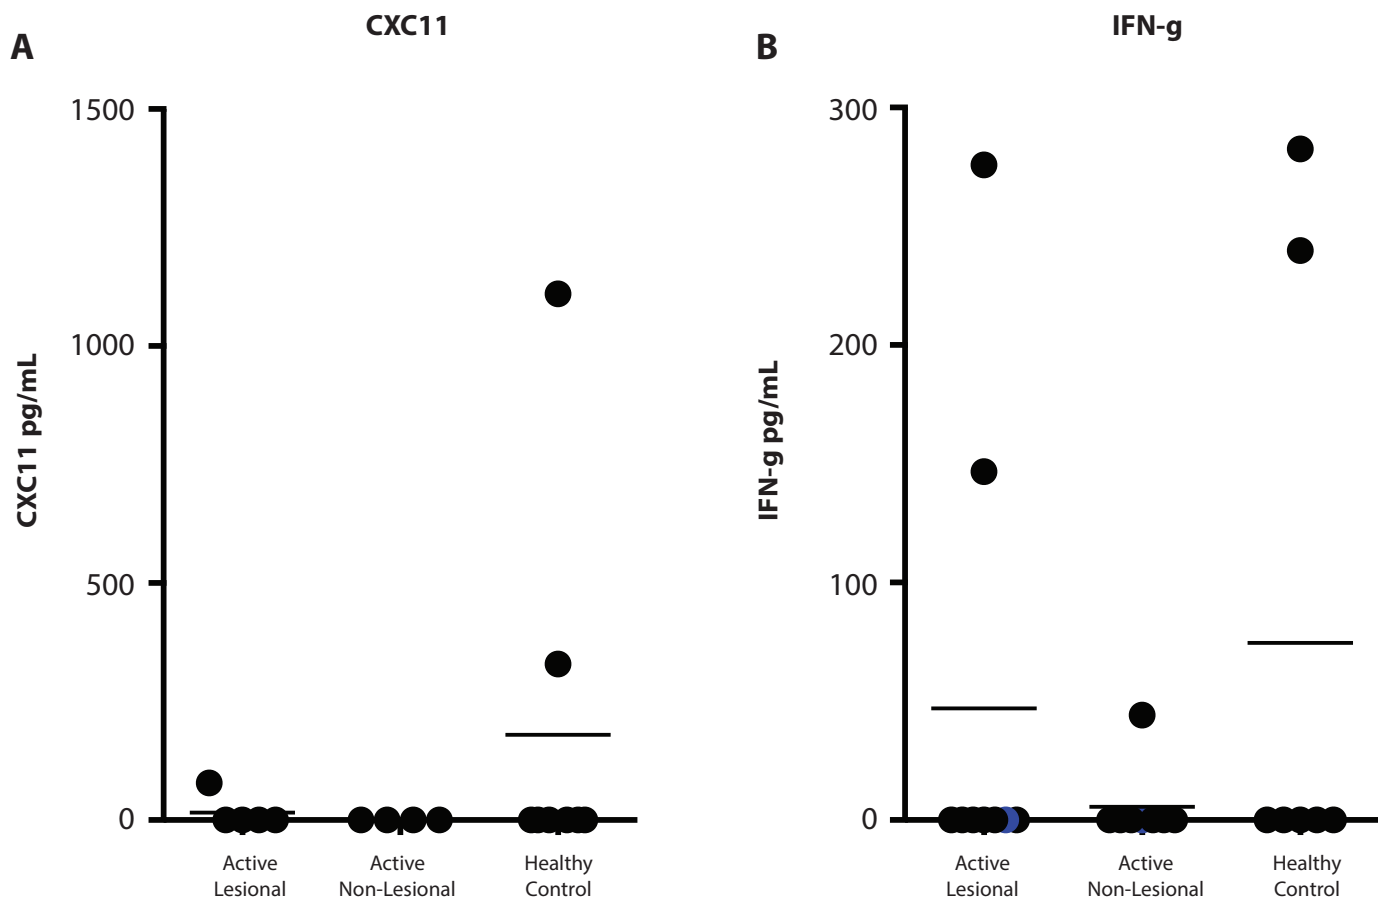

Supplementary Figure 1: Gating Strategy and Flow Controls:

A: CD8<sup>+</sup> and CD4<sup>+</sup> cells were gated in the following manner: singlets, cell gate, live cells by dead stain exclusion, all CD45<sup>+</sup> cells and all T cells (CD3<sup>+</sup> cells). B: Whole stained blood was used to make FMOs to draw the CXCR3 gate.

Supplementary Figure 2: CD3 and CD4 Quantification

A-C: Quantification of CD3 and CD4 positive cells normalized to CD45<sup>+</sup> cells in the skin of vitiligo subjects and healthy controls. Results are shown separately for the Defining Group (A) and Validation Group (B), as well as both data sets combined (C).

D: ROC analysis of compiled CD3 counts from both groups. Red dot signifies a threshold value 6927 normalized CD3 T cells which achieves a sensitivity of 81.4% and specificity of 75.5%.

Supplementary Figure 3: Skin CXCL11 and IFN-g Protein Concentration

A-B: Quantification of CXCL11 (A) and IFN-g (B) protein concentration by ELISA of blister fluid in vitiligo subjects and healthy controls.

Supplementary Table 1: Subject demographic information

+ signifies that the subject had vitiligo for at least the number of indicated years.
